# Supplementary material for: A Cautionary Tale of Anatomical Variations of the Extrahepatic Biliary System and Their Implications for Surgical Procedures: A Systematic Literature Review
Source: Research Square preprint supplement (doi:10.21203/rs.3.rs-6368119/v1), 2025-04-10
Supplement: Supplementary file 1 [file 4801853649f30fee39932fef.docx]

| Study | Year | Location | Method | Total | High insertion | Low insertion | Anterior insertion | Posterior insertion | Medial insertion | Short CD | Long CD |
| --- | --- | --- | --- | --- | --- | --- | --- | --- | --- | --- | --- |
| Adatepe et al [1] | 2016 | Turkey | MRCP | 1041 | . | . | . | . | 20 | 4 | 4 |
| Anandhi et al [2] | 2018 | India | Cadaver | 50 | 8 | 1 | . | . | . | . | . |
| Awazli [3] | 2013 | Iraq | Surgery | 150 | 3 | . | . | . | . | 3 | 8 |
| Getsov et al [4] | 2016 | Bulgaria | MRCP | 351 | 14 | 35 | 19 | 51 | . | . | . |
| Hameed et al [5] | 2019 | Pakistan | Cadaver | 25 | . | 1 | . | . | . | . | . |
| Helli et al [6] | 2011 | Iraq | Surgery | 200 | 14 | 4 | . | . | . | 35 | 22 |
| Khan et al [7] | 2018 | Pakistan | Surgery | 300 | . | . | . | . | . | 7 | 5 |
| Khayat et al [8] | 2014 | Saudi Arabia | ERCP + MRCP | 120 | 88 | 2 | . | . | 6 | 24 | 18 |
| Koshariya et al [9] | 2019 | India | Cadaver | 100 | . | 1 | . | . | . | 6 | . |
| Kullman et al [10] | 1996 | Sweden | Surgery + IOC | 513 | 16 | 2 | . | . | 36 | . | . |
| Kwon et al [11] | 1998 | Japan | Surgery + IVC-SCT | 387 | . | . | 4 | 32 | . | . | . |
| Kwon et al [12] | 1997 | Japan | Surgery + IVC-SCT | 437 | . | 17 | 7 | 35 | 42 | . | . |
| Ahmed et al [13] | 2019 | Sudan | Cadaver | 65 | 5 | 35 | . | . | 6 | 7 | . |
| Onder et al [14] | 2012 | Turkey | MRCP | 590 | . | . | . | . | 58 | 10 | 8 |
| Rajguru et al [15] | 2018 | India | Cadaver | 100 | . | 18 | 4 | 15 | 5 | 25 | 14 |
| Ray [16] | 2018 | India | Cadaver | 100 | . | . | . | . | . | . | . |
| Sarawagi et al [17] | 2016 | India | MRCP | 198 | 11 | 18 | 4 | 40 | 32 | 2 | . |
| Shaikh et al [18] | 2016 | Pakistan | Surgery | 994 | . | . | . | . | . | 10 | 7 |
| Sherifi et al [19] | 2018 | Kosovo | MRCP | 63 | 42 | 2 | 1 | 6 | . | . | . |
| Swain et al [20] | 2020 | India | MRCP | 1038 | . | 444 | 140 | 444 | 1 | . | . |
| Taimur et al [21] | 2011 | Pakistan | Surgery | 200 | . | . | 10 | 2 | . | 14 | 10 |
| Uchiyama et al [22] | 2006 | Japan | ERCP + DIC | 1044 | . | 9 | 185 | 661 | . | . | . |
| Vijay et al [23] | 2019 | India | MRCP | 130 | 55 | 4 | 17 | 75 | 22 | 0 | . |
| Fujiwara et al [24] | 2024 | Japan | MRCP + DIC-CT | 205 | 55 | 8 | 9 | 92 | 9 |  | . |
| Tastemur  [25] | 2020 | Turkey | MRCP | 930 | 137 | 44 | 8 | 63 | 270 | 5 | . |
| Gunduz et al [26] | 2021 | Turkey | MRCP | 307 | 18 | 20 | 6 | 70 | 55 |  | . |
| Shanmugam et al [27] | 2021 | India | Cadaver | 100 | 7 | 3 | 4 | . | 1 | 15 | 3 |

APPENDIX

Table I: Anatomical variations of the cystic duct. CD - Cystic Duct; DIC-CT – Drip Infusion Cholangiography with Computed Tomography; IVC-SCT – Intravenous Infusion Cholangiography with Spiral Computed Tomography

| Study | Year | Location | Method | Total | CD from RHD | CD from LHD | Accessory CD | Absent CD | Subvesical bile duct | Parallel course of CD | Double CD |
| --- | --- | --- | --- | --- | --- | --- | --- | --- | --- | --- | --- |
| Adatepe et al [1] | 2016 | Turkey | MRCP | 1041 | . | 1 | . | . | 9 | . | . |
| Anandhi et al [2] | 2018 | India | Cadaver | 50 | . | . | 2 | . | 5 | 10 | . |
| Awazli [3] | 2013 | Iraq | Surgery | 150 | . | . | . | . | 4 | . | . |
| Getsov et al [4] | 2016 | Bulgaria | MRCP | 351 | . | . | . | . | . | 19 | . |
| Hameed et al [5] | 2019 | Pakistan | Cadaver | 25 | . | . | 1 | . | . | 5 | . |
| Helli et al [6] | 2011 | Iraq | Surgery | 200 | . | . | . | . | . | 22 | . |
| Khan et al [7] | 2018 | Pakistan | Surgery | 300 | 5 | . | . | . | 4 | . | 4 |
| Khayat et al [8] | 2014 | Saudi Arabia | ERCP + MRCP | 120 | 2 | . | 4 | . | 4 | . | . |
| Koshariya et al [9] | 2019 | India | Cadaver | 100 | . | . | . | . | . | 1 | . |
| Kullman et al [10] | 1996 | Sweden | Surgery + IOC | 513 | 1 | . | . | . | 43 | . | . |
| Kwon et al [11] | 1998 | Japan | Surgery + IVC-SCT | 387 | 5 | . | . | . | 4 | 14 | . |
| Kwon et al [12] | 1997 | Japan | Surgery + IVC-SCT | 437 | 7 | . | . | . | 5 | . | . |
| Ahmed et al [13] | 2019 | Sudan | Cadaver | 65 | 3 | . | . | . | . | 9 | . |
| Onder et al [14] | 2012 | Turkey | MRCP | 590 | 2 | . | . | . | 23 | . | . |
| Rajguru et al [15] | 2018 | India | Cadaver | 100 | 1 | . | . | . | . | 23 | . |
| Ray [16] | 2018 | India | Cadaver | 100 | 3 | 2 | 2 | 1 | . | . | 2 |
| Sarawagi et al [17] | 2016 | India | MRCP | 198 | 1 | . | 1 | . | . | 15 | . |
| Shaikh et al [18] | 2016 | Pakistan | Surgery | 994 | . | . | . | . | 5 | . | . |
| Sherifi et al [19] | 2018 | Kosovo | MRCP | 63 | . | . | . | . | . | . | . |
| Swain et al [20] | 2020 | India | MRCP | 1038 | . | . | . | . | . | . | . |
| Taimur et al [21] | 2011 | Pakistan | Surgery | 200 | . | . | . | . | . | . | . |
| Uchiyama et al [22] | 2006 | Japan | ERC + DIC | 1044 | 7 | 3 | 4 | . | 26 | . | 1 |
| Vijay et al [23] | 2019 | India | MRCP | 130 | . | . | . | 0 | . | 23 | . |
| Fujiwara et al [24] | 2024 | Japan | MRCP + DIC-CT | 205 | 5 | . | . | . | . | 7 | . |
| Tastemur [25] | 2020 | Turkey | MRCP | 930 |  | . | . | . | . | 50 | . |
| Shanmugam et al [27] | 2021 | India | Cadaver | 100 | 2 | . | . | . | . | 11 | . |

Table II: Anatomical variations of the cystic duct (continued). CD – Cystic Duct; RHD – Right Hepatic Duct; LHD – Left Hepatic Duct.

| **Study** | **Year** | **Location** | **Method** | **Total** | **Phrygian cap** | **Intrahepatic GB** | **Floating GB** | **Duplication of GB** | **Folded neck** | **Hartmann's pouch** |
| --- | --- | --- | --- | --- | --- | --- | --- | --- | --- | --- |
| Abdullah et al [28] | 2020 | Iraq | Cadaver | 214 | . | . | . | . | . | 10 |
| Bharathi et al [29] | 2020 | India | Cadaver | 60 | . | . | . | . | . | 2 |
| Eijck et al [30] | 2007 | Netherlands | Surgery | 98 | . | . | . | . | . | 51 |
| Rajguru et al [31] | 2010 | India | Cadaver | 60 | . | . | . | . | . | 10 |
| Hameed et al [5] | 2019 | Pakistan | Cadaver | 25 | . | . | 1 | . | . | 1 |
| Mishra [32] | 2020 | India | Cadaver | 84 | 5 | 7 | . | 2 | . | . |
| Mishra et al [33] | 2018 | India | Cadaver | 50 | 4 | . | . | . | 2 | . |
| Nadeem [34] | 2016 | UAE | Cadaver | 80 | . | . | 1 | 1 | . | 5 |
| Nahar et al [35] | 2012 | Bangladesh | Cadaver | 70 | . | . | . | . | . | 4 |
| Anjankar et al [36] | 2013 | India | Cadaver | 90 | 5 | . | . | . | 4 | . |
| Dundareddy et al [37] | 2017 | India | Cadaver | 50 | 1 | . | . | . | . | 2 |
| Rajendra et al [38] | 2015 | India | Cadaver | 78 | 3 | 7 | . | 1 | . | . |
| Shaikh et al [18] | 2016 | Pakistan | Surgery | 994 | 3 | 12 | 2 | . | . | . |
| Sreekanth et al [39] | 2016 | India | Cadaver | 100 | 4 | . | . | . | 6 | . |
| Srivastava et al [40] | 2019 | India | Cadaver | 30 | 2 | . | . | . | . | 1 |
| Tiwari et al [41] | 2018 | India | Cadaver | 50 | 2 | 1 | . | . | 3 | 4 |

Table III: Anatomical variations of the gallbladder. GB – gallbladder.

| Study | Year | Location | Method | Total | RHA | Aberrant RHA | LHA | PHA | CHA | GDA | SPDA | Liver | Absent CA | Double CA |
| --- | --- | --- | --- | --- | --- | --- | --- | --- | --- | --- | --- | --- | --- | --- |
| Abeysuriya et al [42] | 2016 | Sri Lanka | Cadaver | 200 | 178 | . | . | . | . |  | . | . | 0 | 10 |
| Ahmed et al [43] | 2015 | India | Cadaver | 60 | 57 | 2 | . | . | . | 1 | . | . | 0 | 1 |
| Anandhi et al [44] | 2018 | India | Cadaver | 50 | 44 | 1 | . | . | . | . | . | . | 0 | 1 |
| Anson [45] | 1956 | USA | Cadaver | 600 | 415 | 90 | 40 | 23 | 3 | 17 | 1 | . | 0 | . |
| Ayyaz et al [46] | 2001 | Pakistan | Surgery | 400 | 364 | . | . | . | . | . | . | . | 0 | 36 |
| Badshah et al [47] | 2016 | Pakistan | Surgery | 66 | 61 | . | . | . | 4 | . | . | . | 1 | . |
| Bakheit [48] | 2009 | Sudan | Cadaver | 160 | 125 | . | 3 | . | 27 | 5 | . | . | 0 | . |
| Balija et al [49] | 1999 | Croatia | Surgery | 200 | 147 | 11 | 2 |  | . | 9 | . | . | 0 | 31 |
| Chen et al [50] | 2000 | Taiwan | Cadaver | 72 | 55 | . | 3 | 3 | 2 | 1 | 1 | . | 0 | . |
| Dandekar et al [51] | 2016 | India | Cadaver | 82 | 65 | 10 | 1 | 3 | 2 | . | . | . | 0 | 23 |
| Daseler et al [52] | 1947 | USA | Cadaver | 500 | 416 | 3 | 36 | . | 16 | 15 | 1 | . | 0 | 15 |
| de Silva et al [53] | 2001 | Sri Lanka | Cadaver | 50 | 48 | . | . | . | 2 | . | . | . | 0 | . |
| Ding et al [54] | 2007 | China | Surgery | 600 | 586 | 18 | 0 | . | . | 45 | . | 15 | 0 | 73 |
| Flisinski et al [55] | 2004 | Poland | Cadaver | 34 | 28 | . | 2 | 3 | . | 1 | . | . | 0 | 1 |
| Futara et al [56] | 2001 | Ethiopia | Cadaver | 110 | 83 | . | 5 | . | 14 | 8 | . | . | 0 | 11 |
| Kankhare et al [57] | 2016 | India | Cadaver | 40 | 28 |  | 2 | 3 |  | 4 |  | . | 0 | 1 |
| Khalil et al [58] | 2008 | Bangladesh | Cadaver | 60 | 54 | . | 2 | 1 | 1 | 1 | . | . | 0 | . |
| Koshariya et al [59] | 2019 | India | Cadaver | 100 | 99 | . | 1 | . | . |  | . | . | 0 | . |
| Kumari et al [60] | 2016 | India | Cadaver | 36 | 34 | . | . | 1 | . | . | . | . | 0 | . |
| Sebben et al [61] | 2013 | Brazil | Cadaver | 30 | 27 | . | 1 | . | 1 | . | . | . | 1 | . |
| Singh et al [62] | 2019 | India | Surgery | 600 | 426 | 28 | 0 | . | . | 42 | . | 10 | 0 | 88 |
| Sing'ombe et al [63] | 2019 | Zambia | Cadaver | 32 | 28 | . | 1 | 3 | . | . | . | . | 0 | 3 |
| Sugita et al [64] | 2008 | Japan | CT scan | 234 | 225 | 24 | 17 | 4 | 1 | 4 | . | . | 20 | . |
| Taimur et al [65] | 2011 | Pakistan | Surgery | 200 | 192 | . | . | . | . | . | . | . | 6 | 12 |
| Tejaswi et al [66] | 2013 | India | Cadaver | 100 | 92 | 4 | 1 | 2 | . | 1 | . | . | 0 | . |
| Zubair et al [67] | 2012 | Pakistan | Surgery | 220 | 166 | 2 | . | . | . | . | . | . | 0 | 26 |

Table IV: Anatomical variations in the origin of the cystic artery. CA – Cystic Artery; RHA – Right Hepatic Artery; LHA – Left Hepatic Artery; PHA – Proper Hepatic Artery; CHA – Common Hepatic Artery; GDA – Gastroduodenal Artery; SPDA – Superior Pancreaticoduodenal Artery

| Study | Year | Location | Method | Total | Caterpillar Hump RHA | Anterior to CD | Posterior to CD | Anterior to CHD | Posterior to CHD | Outside Callot's Triangle |
| --- | --- | --- | --- | --- | --- | --- | --- | --- | --- | --- |
| Abeysuriya et al [42] | 2016 | Sri Lanka | Cadaver | 200 | . | 2 | . | 10 | 178 | . |
| Ahmed et al [43] | 2015 | India | Cadaver | 60 | . | . | . | 8 | 38 | . |
| Ayyaz et al [46] | 2001 | Pakistan | Surgery | 400 | 4 | . | . | 10 | 386 | . |
| Badshah et al [47] | 2016 | Pakistan | Surgery | 66 | . | . | . | . | . | 21 |
| Bakheit [48] | 2009 | Sudan | Cadaver | 160 | . | 85 | 21 | 11 | 0 | . |
| Balija et al [49] | 1999 | Croatia | Surgery | 200 | . | . | . | . | . | 11 |
| Chen et al [50] | 2000 | Taiwan | Cadaver | 72 | . | . | . | 17 | 45 | 10 |
| Dandekar et al [51] | 2016 | India | Cadaver | 82 | . | . | . | 22 | 5 | 3 |
| Daseler et al [52] | 1947 | USA | Cadaver | 500 | . | 6 | . | 123 | 12 | 95 |
| de Silva et al [53] | 2001 | Sri Lanka | Cadaver | 50 | . | . | . | 7 | 8 | . |
| Ding et al [54] | 2007 | China | Surgery | 600 | 12 | 3 | 5 | . | . | 78 |
| Flisinski et al [55] | 2004 | Poland | Cadaver | 34 | . | . | . | 10 | 22 | 1 |
| Futara et al [56] | 2001 | Ethiopia | Cadaver | 110 | . | . | . | 31 | 12 | 21 |
| Kankhare et al [57] | 2016 | India | Cadaver | 40 | . | 2 | . | 4 | 36 | 2 |
| Koshariya et al [59] | 2019 | India | Cadaver | 100 | . | . | . | 1 | 99 | . |
| Kumari et al [60] | 2016 | India | Cadaver | 36 | . | 1 | 1 | . | . | 2 |
| Singh et al [62] | 2019 | India | Surgery | 600 | . | . | . | . | . | 80 |
| Sing'ombe et al [63] | 2019 | Zambia | Cadaver | 32 | . | 2 | . | . | . | 3 |
| Taimur et al [65] | 2011 | Pakistan | Surgery | 200 | 6 | 12 | 6 | . | . | . |
| Tejaswi et al [66] | 2013 | India | Cadaver | 100 | . | . | . | 30 | 35 | 35 |
| Zubair et al [67] | 2012 | Pakistan | Surgery | 220 | . | . | . | . | . | 16 |

Table V: Anatomical variations in the course of cystic artery. CD - Cystic Duct; RHA - Right Hepatic Artery; CHD - Common Hepatic Duct

**References for the Appendix**

1. Adatepe, M., Adibelli, Z.H., Esen, O.S. *et al.* Anatomic Variations of Biliary Ducts: Magnetic Resonance Cholangiopancreatography Findings of 1041 Consecutive Patients. Eur Surg 48, 296–303 (2016). [Doi: 10.1007/S10353-016-0393-5](https://doi.org/10.1007/s10353-016-0393-5)
2. Anandhi, PG, Alagavenkatesan VN. Anatomical variations in the extra hepatic biliary system: a cross sectional study. Int J Res Med Sci. 2018 Mar;6(4):1342-1347. Doi: <https://doi.org/10.18203/2320-6012.ijrms20181294>

Awazli LG. Anatomical Variations of Extrahepatic Biliary System. Iraqi J Med Sci 2013;11(3):258-264. <https://api.semanticscholar.org/CorpusID:20210914>

1. Getsov P, Vladimirov B. Anatomical variations of confluence of cystic duct in Bulgarian population: diagnostic opportunities of Magnetic Resonance Imaging. International Journal of Medical Science and Clinical Invention 2016. 10.18535/ijmsci/v3i5.07
2. Hameed O, Sabahat G, Wajih UR, Maqbool A, Athar Z, Owais MM. Extrahepatic biliary apparatus: Anatomical variations and their clinical significance. [Pakistan Journal of Medical & Health Sciences. 2019 Sep;13(3):514. https://www.pjmhsonline.com/2019/july_sep/pdf/513.pdf](Pakistan%20Journal%20of%20Medical%20&%20Health%20Sciences.%202019%20Sep;13(3):514.%20https://www.pjmhsonline.com/2019/july_sep/pdf/513.pdf)

Helli A, Taee M, Khafaji M. Laparoscopic Surgical Anatomy of Calot`s Triangle. Karbala J Med 2011 Jun;4(1):957-963. [https://www.iasj.net/iasj?func=fulltext&aId=73194](https://www.iasj.net/iasj/download/e2895221c0674041)

1. Khan AS, Paracha SA, Shah Z, Tahir M, Wahab K. Anatomical variations of cystic duct encountered during open cholecystectomy*.*Khyber Medical University Journal 2012:4:19-22. [https://www.kmuj.kmu.edu.pk/article/view/8614.](https://www.iasj.net/iasj?func=fulltext&aId=73194)
2. Khayat MF, Al-Amoodi MS, Aldaqal SM, Sibiany A. Abnormal Anatomical Variations of Extra-Hepatic Biliary Tract, and Their Relation to Biliary Tract Injuries and Stones Formation. Gastroenterology Res. 2014 Feb;7(1):12-16. doi: 10.14740/gr596e
3. Koshariya M, Behram S, Singour JP, Tiwari S, Khare V. Int Surg J. 2019 Sep;6(9):3111-3116. doi: 10.18203/2349-2902.isj20193658
4. Kullman E, Borch K, Lindstrom E, Svanvik J, Anderberg B. Value of routine intraoperative cholangiography in detecting aberrant bile ducts and bile duct injuries during laparoscopic cholecystectomy. Br J Surg 1996 Feb;83(2):171-175. doi: 10.1046/j.1365-2168.1996.02190.x
5. Kwon AH, Inui H, Imamura A, Uetsuji S, Kamiyama Y. Preoperative assessment for laparoscopic cholecystectomy: feasibility of using spiral computed tomography. Ann Surg. 1998 Mar;227(3):351-6. doi: 10.1097/00000658-199803000-00006
6. Kwon AH, Uetsuji S, Ogura T, Kamiyama Y. Spiral computed tomography scanning after intravenous infusion cholangiography for biliary duct anomalies. Am J Surg. 1997 Oct;174(4):396-401; discussion 401-2. [doi: 10.1016/S0002-9610(97)80050-5](https://doi.org/10.1016/S0002-9610(97)80050-5)
7. Ahmed AYY, Salih AA, Adam MAA, Mohammed SSS, Elhasan MEA, Abdalla MA. Anatomical variations of the cystic duct and their surgical implications in Sudanese population: a cadaveric study. Int J Anat Res. 2019;7(2.1):6416-19. doi: [10.16965/ijar.2019.131](https://dx.doi.org/10.16965/ijar.2019.131)
8. Onder H, Ozdemir MS, Tekbaş G, Ekici F, Gümüş H, Bilici A. 3-T MRI of the biliary tract variations. Surg Radiol Anat. 2013 Mar;35(2):161-7. doi: 10.1007/s00276-012-1021-0
9. Rajguru J, Dave M. The Morphological Aberrations of Cystic Duct and its Clinical Significance: A Gross Anatomical Study. International Journal of Anatomy Radiology and Surgery 2018;7(2):23-28. doi: 10.7860/IJARS/2018/35596:2386
10. Ray S. Variations in the Termination of Cystic Duct by gross Dissection Method: A Report of 100 Cases of Odishan Population. J Med Sci Clin Res 2018;6(8):430-437. [doi: 10.18535/jmscr/v6i8.70](https://dx.doi.org/10.18535/jmscr/v6i8.70)
11. Sarawagi R, Sundar S, Gupta SK, Raghuwanshi S. Anatomical Variations of Cystic Ducts in Magnetic Resonance Cholangiopancreatography and Clinical Implications. Radiol Res Pract. 2016;2016:3021484. doi: 10.1155/2016/3021484
12. Shaikh B, Baloach IB, Shaikh SA. Anatomical variations: Dangerous culprits behind difficult cholecystectomies. Rwal Medical Journal 2016 Sep;41(3):316-319. <https://www.rmj.org.pk/?mno=218777>
13. Sherifi F, Bajraktari I, Bexheti S, Lahu A. Anatomic variations of the cystic duct assessed by magnetic resonance cholangiopancreatography. Italian. Italian Journal of Anatomy and Embryology 2018 Nov;123(2):158-174. Doi: 10.13128/IJAE-24165

Swain B, Sahoo RK, Sen KK, G MK, Parihar SS, Dubey R. Evaluation of intrahepatic and extrahepatic biliary tree anatomy and its variation by magnetic resonance cholangiopancreatography in Odisha population: a retrospective study. Anat Cell Biol. 2020 Mar;53(1):8-14. doi: 10.5115/acb.19.177

1. Taimur M, Hasan A, Masood R, Ullah S, Imran M. Ductal Variations in the Calot’s Triangle Seen on Laparoscopic Cholecystectomy. Medical Forum Monthly 2011;22(4):30-34. <https://medicalforummonthly.com/index.php/mfm/article/view/4804>
2. Uchiyama K, Tani M, Kawai M, Ueno M, Hama T, Yamaue H. Preoperative evaluation of the extrahepatic bile duct structure for laparoscopic cholecystectomy. Surg Endosc. 2006 Jul;20(7):1119-23. doi: 10.1007/s00464-005-0689-1
3. Vijay S, Ragupathi S. Magnetic resonance cholangiopancreatographic evaluation of cystic duct anatomical variants in Pondicherry population. International Archives of Integrated Medicine 2019; 6(6): 81-86. <https://api.semanticscholar.org/CorpusID:211199813>
4. Fujiwara K, Hiraka K, Shindo K, Abe A, Masatsugu T, Hirano T, Sada M. Variations in the cystic duct: frequency and the relationship among insertion sides and heights on the bile duct. Surg Radiol Anat. 2024 Feb;46(2):223-230. doi: 10.1007/s00276-023-03275-9
5. Taştemur Y. Anatomical variations of the cystic duct in Turkish population and their association with biliary track stone. J Coll Physicians Surg Pak. 2020; 30(10):1005-1008. Doi**:** 10.29271/jcpsp.2020.10.1005
6. Gündüz, N., Doğan, M.B., Alacagöz, M. et al. Anatomical variations of cystic duct insertion and their relationship with choledocholithiasis: an MRCP study. Egypt J Radiol Nucl Med. 2021 Aug;52(1):202. doi: 10.1186/s43055-021-00579-x
7. Shanmugam S, Subbiah K, Thiagarajan S. Morphological variations of the cystic duct and its clinical significance: A cadaveric study. National Journal of Clinical Anatomy 2021;10(3):155-159. Doi: 10.4103/NJCA.NJCA_69_21
8. Abdullah NM, Kareem A, Mohamed Q, Akkila S. A cadaveric study on the prevalence of hartmann pouch of gallbladder with relation to gallstones in Basrah City. Indian J Forensic Med Toxicol. 2020;14(1):333-338. Doi: 10.37506/v14/i1/2020/ijfmt/192919
9. Bharathi D, Jyothilakshmi GL, Shruthi BN. Morphometry and morphology of variations of gall bladder: a cadaveric study. Int J Anat Res 2020;8(2.1):7413-17. Doi: <https://dx.doi.org/10.16965/ijar.2020.118>
10. van Eijck FC, van Veen RN, Kleinrensink GJ, Lange JF. Hartmann's gallbladder pouch revisited 60 years later. Surg Endosc. 2007 Jul;21(7):1122-5. doi: 10.1007/s00464-006-9058-y
11. Rajguru J, Fulzele RR. Variations in Internal Morphology of the Gall Bladder. [Journal of Datta Meghe Institute of Medical Sciences University](https://www.researchgate.net/journal/Journal-of-Datta-Meghe-Institute-of-Medical-Sciences-University-2250-1231?_tp=eyJjb250ZXh0Ijp7ImZpcnN0UGFnZSI6InB1YmxpY2F0aW9uIiwicGFnZSI6InB1YmxpY2F0aW9uIn19) 2010 Dec; 5(4):211- 214. <https://www.researchgate.net/publication/265206797_Variations_in_Internal_Morphology_of_the_Gall_Bladder>
12. Mishra D. Morphometric study of gall bladder. International Journal of Forensic Medicine 2020; 2(1): 07-09. [Doi: 10.33545/27074447.2020.v2.i1a.17](https://doi:%2010.33545/27074447.2020.v2.i1a.17)
13. **Mishra P, Fulse A, Kseersagar DD.** A study of variations in the external morphology of gall bladder. World Journal of Pharmaceutical and Medical Research 2018;4(3):276-278. <https://www.wjpmr.com/home/article_abstract/1070>
14. Nadeem G. A study of the clinico-anatomical variations in the shape and size of gallbladder. J. Morphol. Sci. 2016;33(2):62-67. [Doi: 10.4322/jms.082714](http://dx.doi.org/10.4322/jms.082714)
15. Nahar, N., Ara, S., Rahman, M., Shahriah, S., & Afroz, H. Presence of Hartmann’s pouch in human gallbladder. Bangladesh Journal of Anatomy 2013;10(2):57–58. [Doi: 10.3329/bja.v10i2.17283](https://doi.org/10.3329/bja.v10i2.17283)
16. Anjankar VP, Panshewdikar PN, Joshi DS, Anjankar AP. A cadaveric study involving variations in external morphology of gall bladder. Int J Med Res Health Sci. 2013;2(2):239-242. doi: 10.5958/j.2319-5886.2.2.029

Dundaraddy R, Sumana R. Comparative study of Human Gall Bladder variations in south Indian population. Int J Sci Res. 2018 Apr;6(4):36-38. <https://www.worldwidejournals.com/international-journal-of-scientific-research-(IJSR)/fileview.php?val=April_2017_1491826106__14.pdf>

1. Rajendra R, Makandar UK, Tejaswi HL, Patil BG. Indian Journal of Forensic and Community Medicine 2015 Jan – Mar;2(1):35-42. <https://www.researchgate.net/publication/291349452_Morphometricstudy_of_gall_bladder_in_south_Indian_populationcadaveric_study>
2. Sreekanth C, Kumari MT, Hema L. Variations In The External Morphology Of Gall Bladder: A Cadaveric Study In South Coastal Population. IOSR Journal of Dental and Medical Sciences 2016;15(9):14-20. doi: 10.9790/0853-1509091420
3. Srivastava DS, Khan DAZ. Morphology of Gall Bladder - A Cadaveric Study. Journal of Current Medical Research and Opinion 2019;*2*(10), 293–298. [Doi: 10.15520/jcmro.v2i10.217](https://doi.org/10.15520/jcmro.v2i10.217)

Tiwari S, Study of anatomic variations of human gall bladder and its clinical importance. Indian J Clin Anat Physiol 2018;5(1):124-128. doi: 10.18231/2394-2126.2018.0028

1. Abeysuriya V, Kumarage S, Hasan R, Wijesinghe J. Morphological variations of cystic artery in triangle of Calot in laparoscopic cholecystectomy: experience in tertiary care surgical unit in South Asian country. Journal of Medical and Dental Science Research 2016;3(9):18-19. <https://api.semanticscholar.org/CorpusID:44187263>
2. Ahmed K, Sylvia S. Origin of cystic artery and its position in relation to biliary ducts and Calot's triangle. J Evol Med Dent Sci. 2015 Jan;4(1):1-5. [doi: 10.14260/jemds/2015/1](http://dx.doi.org.eux.idm.oclc.org/10.14260/jemds/2015/1)

Anandhi, PG, Alagavenkatesan VN. Anatomical variations in the extra hepatic biliary system: a cross sectional study. Int J Res Med Sci. 2018 Mar;6(4):1342-1347. [Doi: 10.18203/2320-6012.ijrms20181294](https://doi.org/10.18203/2320-6012.ijrms20181294)

1. Anson BJ. Anatomical considerations in surgery of the gallbladder. Q Bull Northwest Univ Med Sch. 1956;30(3):250-9. <https://pmc.ncbi.nlm.nih.gov/articles/PMC3803522/>
2. Ayyaz M, Fatima T, Ahmed G. Arterial Anatomy in Calot’s Triangle as Viewed through the Laparoscope. Ann King Edw Med Univ. 2001; 7(3):183-185. doi: 10.21649/akemu.v7i3.1851
3. Badshah M, Soames R, Nawab J, Baloch FA, Khan J, Hasnain J. The anatomical relationship of cystic artery to Calot’s triangle. J Med Sci. 2016 Oct;24(4):199-201. <https://api.semanticscholar.org/CorpusID:198243863>

Bakheit MA. Prevalence of variations of the cystic artery in the Sudanese. East Mediterr Health J. 2009 Sep-Oct;15(5):1308-12. <https://pubmed.ncbi.nlm.nih.gov/20214146/>

1. Balija M, Huis M, Nikolic V, Stulhofer M. Laparoscopic visualization of the cystic artery anatomy. World J Surg. 1999 Jul;23(7):703-7. doi: 10.1007/pl00012372
2. Chen TH, Shyu JF, Chen CH, Ma KH, Wu CW, Lui WY, et al. Variations of the cystic artery in Chinese adults. Surg Laparosc Endosc Percutan Tech. 2000 Jun;10(3):154-7. doi: 10.1097/00019509-200006000-00011
3. Dandekar U, Dandekar K. Cystic Artery: Morphological Study and Surgical Significance. Anat Res Int. 2016;2016:7201858. Doi: 10.1155/2016/7201858
4. Daseler EH, Anson BJ, Hambley WC, Reimann AF. The cystic artery and constituents of the hepatic pedicle. A study of 500 specimens. Surg. Gynecol. Obstet 85:47-63, 1947. <https://pubmed.ncbi.nlm.nih.gov/20249245/>
5. de Silva M, Fernando D. Anatomy of the Calot's triangle and its relevance to laparoscopic cholecystectomy. Ceylon Med J. 2001 Mar;46(1):33-4. Doi: 10.4038/cmj.v46i1.6539
6. Ding YM, Wang B, Wang WX, Wang P, Yan JS. New classification of the anatomic variations of cystic artery during laparoscopic cholecystectomy. World J Gastroenterol. 2007 Nov 14;13(42):5629-34. Doi: 10.3748/wjg.v13.i42.5629

Flisiński P, Szpinda M, Flisiński M. The cystic artery in human foetuses. Folia Morphol (Warsz). 2004 Feb;63(1):47-50. https://pubmed.ncbi.nlm.nih.gov/15039899/

1. Futara G, Ali A, Kinfu Y. Variations of the hepatic and cystic arteries among Ethiopians. Ethiop Med J. 2001 Apr;39(2):133-42. <https://pubmed.ncbi.nlm.nih.gov/11501290/>
2. Kankhare SB, Patil AD, Kate SP. A study of an anomalous origin of cystic artery and its relation with Calot’s triangle – cadaveric study. Int J Cur Res Rev. 2016 Aug;8(15):39-43. <https://ijcrr.com/uploads/220_pdf.pdf>

Khalil M, Sultana ZR, Rahman HR, Sultana SZ, Mannan S, Rahman MM et al. Origin and Position of Cystic Artery in Bangladeshi Corpse. Journal of Bangladesh Society of Physiologist 2009;3:66–70. [Doi: 10.3329/jbsp.v3i0.1801](https://doi.org/10.3329/jbsp.v3i0.1801)

Koshariya M, Behram S, Singour JP, Tiwari S, Khare V. Anomalous anatomical variation in extrahepatic biliary tree and pancreas and its related vessels: a cadaveric study. Int Surg J. 2019 Sep;6(9):3111-3116. Doi: 10.18203/2349-2902.isj20193658

Kumari R, Kumari S, Prasad M, Britto NJ, Subratanag. Variations in origin and course of cystic artery and its relation with Calot’s triangle. IOSR Journal of Dental and Medical Sciences 2016;15(7): 24-27. Doi:10.9790/0853-150752427

Sebben GA, Rocha SL, Sebben MA, Parussolo Filho PR, Gonçalves BH. Variations of hepatic artery: anatomical study on cadavers. Rev Col Bras Cir. 2013 May-Jun;40(3):221-6. English, Portuguese. Doi: 10.1590/s0100-69912013000300010

Singh H, Singh NK, Kaul RK, Gupta A, Tiwari S. Prevalence of anatomical variations of cystic artery during laparoscopic cholecystectomy. Int Surg J. 2019 Oct;6(10):3781-3785. doi: 10.18203/2349-2902.isj20194441

Sing`ombe I, Nambule V, Mutalife F, Mutemwa S, Kafumukache E, Erzingastian K. A cadaveric study on variations of the cystic artery in the Department of Pathology, at the University Teaching Hospitals, Lusaka, Zambia. Anatomy Journal of Africa 2018;7(2):1298-1303. Doi: [10.4314/aja.v8i1.183951](https://doi.org/10.4314/aja.v8i1.183951)

Sugita R, Yamazaki T, Fujita N, Naitoh T, Kobari M, Takahashi S. Cystic artery and cystic duct assessment with 64-detector row CT before laparoscopic cholecystectomy. Radiology. 2008 Jul;248(1):124-31. Doi: 10.1148/radiol.2481071156

Taimur M, Hasan A, Ullah S, Masood R, Imran M. Vascular variations in the Calot’s triangle seen on laparoscopic cholecystectomy. Pak Armed Forces Med J. 2011 Oct;61(4):506-10. <https://pafmj.org/PAFMJ/article/view/1071>

Tejaswi HL, Dakshayani KR, Ajay N. Prevalence of anatomical variations of cystic artery in South Indian cadavers. Int J Res Med Sci. 2013;1(4):424-428. Doi: 10.5455/2320-6012.ijrms20131122

Zubair M, Habib L, Mirza RM, Cnanna MA, Yousuf M, Quraishy MS. Anatomical variations of cystic artery: telescopic facts. Med J Malaysia. 2012 Oct;67(5):494-6. https:// pubmed.ncbi.nlm.nih.gov/23770866/
